# Supplementary material for: Composite interfaces of g-C3N4 fragments loaded on a Cu substrate for CO2 reduction
Source: Royal Society of Chemistry journal article supplement (doi:10.1039/d3cp05818b), 2024-01-01
Supplement: d3cp05818b1.pdf [file d3cp05818b1.pdf]

*Electronic Supplementary Information for*

**Composite interface of g-C<sub>3</sub>N<sub>4</sub> fragment loaded on Cu  
substrate for CO<sub>2</sub> reduction**

Qiang Gong, Jianling Xiong, Tanyu Zhou, Wenkai Bao, Xiuyun

Zhang, Guiwu Liu\*, Guanjun Qiao and Ziwei Xu\*

<sup>a</sup>School of Materials Science and Engineering, Jiangsu University, Zhenjiang 212013, China.

<sup>b</sup>College of Physics Science and Technology, Yangzhou University, Yangzhou 225002, China.

\*E-mail address: [ziweixu2014@ujs.edu.cn](mailto:ziweixu2014@ujs.edu.cn) (Z. Xu); [gwliu76@ujs.edu.cn](mailto:gwliu76@ujs.edu.cn) (G. Liu)

## Setup of DFT calculations

The three C<sub>3</sub>N<sub>4</sub>/Cu systems have been modeled by two layers of Cu atoms and one layer C<sub>3</sub>N<sub>4</sub> fragments. During structure optimizations, the adsorbates, g-C<sub>3</sub>N<sub>4</sub> fragment, and top layer of the Cu atoms are allowed to move freely. The lattice parameters for C<sub>3</sub>N<sub>4</sub>/Cu(111) and C<sub>3</sub>N<sub>4</sub>/Cu(111)-b are set as a=b=15.34 Å, c=30 Å, α =β =90°, γ=120.00°. For C<sub>3</sub>N<sub>4</sub>/Cu(110) and C<sub>3</sub>N<sub>4</sub>/Cu(110)-b, they are a=21.69 Å, b=15.34 Å, c=30 Å, α =β =γ= 90°; For C<sub>3</sub>N<sub>4</sub>/Cu(100) and C<sub>3</sub>N<sub>4</sub>/Cu(100)-b, they are a=b=15.34 Å, c=30 Å, α=β=γ=90°, respectively.

## Definitions of adsorption energy (E<sub>ad</sub>), free energy change (ΔG) and binding energy (E<sub>binding</sub>)

The adsorption energies (E<sub>ad</sub>) are calculated by the following equations.

$$E_{ad} = E_{tot} - E_{substrate} - E_{adsorbate}$$

Where  $E_{tot}$ ,  $E_{substrate}$  and  $E_{adsorbate}$  are the energies of substrate with adsorbates, the substrate catalysts, and the isolated adsorbates, respectively. All energies above are obtained under the same parameter settings.

For each reaction step of CO<sub>2</sub>RR, the free energy changes (ΔG) are using the computational hydrogen electrode (CHE) model, which are expressed by the following equations

$$\Delta G = \Delta E + \Delta E_{ZPE} - T\Delta S + \Delta G_{PH}$$

Where ΔE is the changes in the reaction energy. ΔE<sub>ZPE</sub> and ΔS are the differences in zero point energy and entropy, respectively, between the two states. T is the temperature (298.15 K). ΔG<sub>PH</sub> is expressed as  $\Delta G_{PH} = K_B T \ln 10 \times pH$ , and in this work, the pH is set as 0.

To evaluate the stability of the different C<sub>3</sub>N<sub>4</sub>/Cu configurations, the binding energy of the composite structure of C<sub>3</sub>N<sub>4</sub>/Cu is expressed by the following equation

$$E_{binding} = E_{C_3N_4/Cu} - E_{Cu} - E_{C_3N_4}$$

Where  $E_{C_3N_4/Cu}$ ,  $E_{Cu}$  and  $E_{C_3N_4}$  are the energies of the  $C_3N_4/Cu$ , the Cu substrate, and the fragment of g- $C_3N_4$ .

## Definitions of limiting potential ( $U_L$ ) and overpotential ( $\eta$ )

The limiting potential ( $U_L$ ) is calculated by the following equations:

$$U_L = - \frac{\Delta G_{\max}}{e}$$

The  $U_L$  is the minimum negative potential that makes each basic step exothermic. Where  $\Delta G_{\max}$  is the maximum free energy rise for the entire  $CO_2RR$  path. The overpotential ( $\eta$ ) is evaluated as the difference between the equilibrium potential and the limiting potential. Therefore, the overpotential is defined as

$$\eta = U_0 - U_L$$

where  $U_0$  and  $U_L$  is the equilibrium potential and limiting potential, respectively.

## $CO_2RR$ pathways

For  $CO_2RR$ , the main consideration is the hydrogenation of  $*CO$  to form  $*CHO$  followed by the hydrogenation to form  $CH_3OH$  or  $CH_4$ . The main possible pathways are as follows

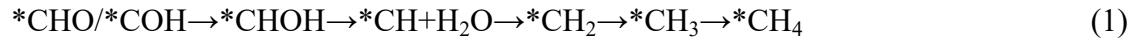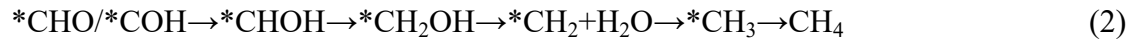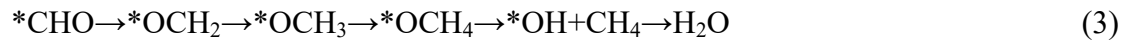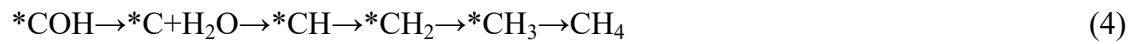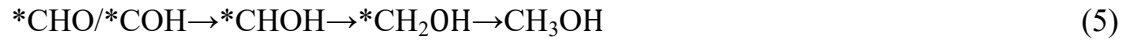

In eqn (3),  $*OCH_3$  is not generated stably in  $C_3N_4/Cu$  composite system. Therefore, eqn (3) is not considered. However, the formation of  $*COH$  intermediates always involves a high energy barrier compared with  $*CHO$ . Therefore the main consideration of  $CH_4$  and  $CH_3OH$  production in this work is the path of  $*CHO$  in eqn(1), eqn(2) and eqn(5).

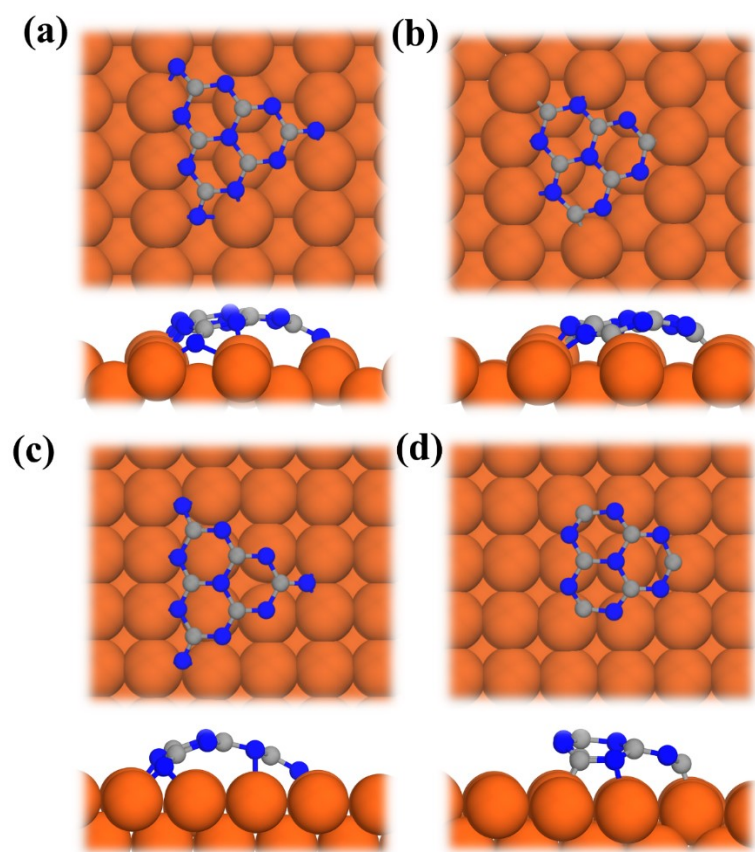

**Figure S1.** The top and side views of (a)  $C_3N_4/Cu(110)$  (b)  $C_3N_4/Cu(110)$ -b (c)  $C_3N_4/Cu(100)$  and (d)  $C_3N_4/Cu(100)$ -b.

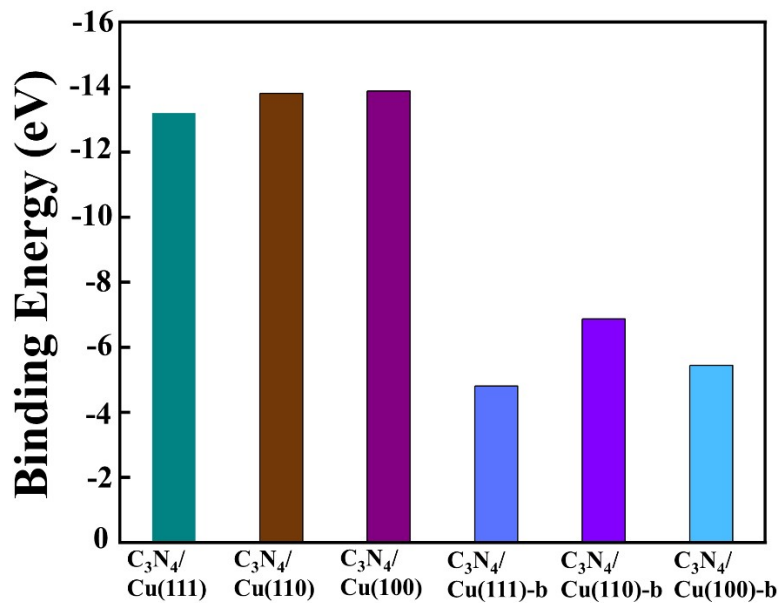

**Figure S2.** Binding energies of structures for two different g-C<sub>3</sub>N<sub>4</sub> fragments loaded on different Cu facets.

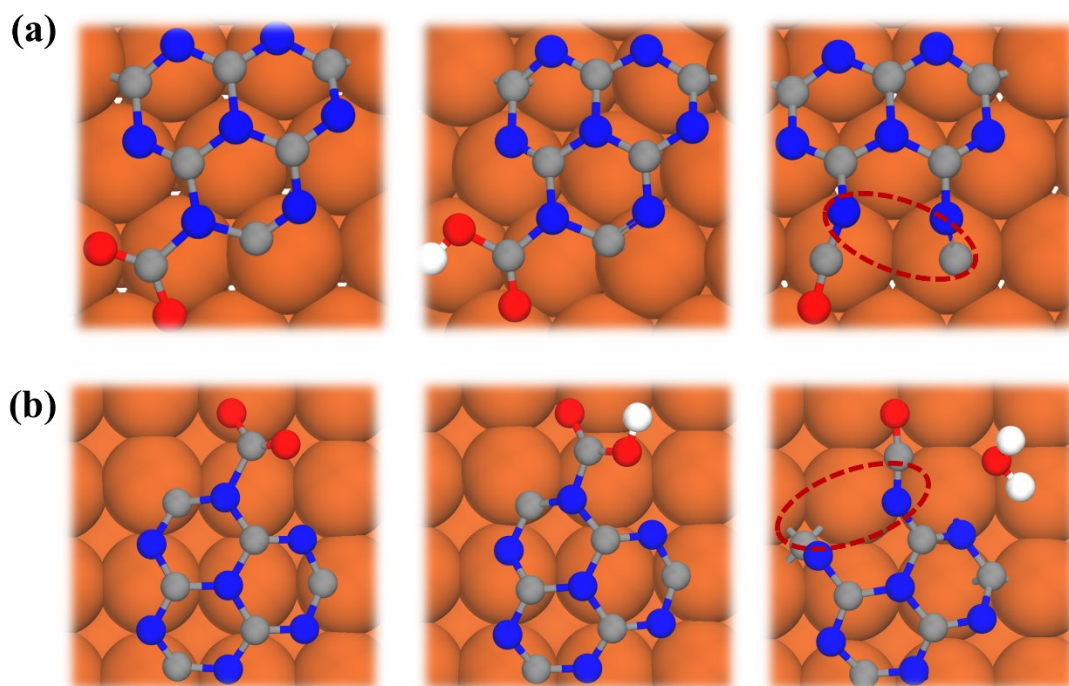

**Figure S3.** The structures transformations of CO<sub>2</sub> reduced to CO pathway on (a) C<sub>3</sub>N<sub>4</sub>/Cu(111)-b and (b) C<sub>3</sub>N<sub>4</sub>/Cu(100)-b, the red lines highlight the destroyed g-C<sub>3</sub>N<sub>4</sub> fragments.

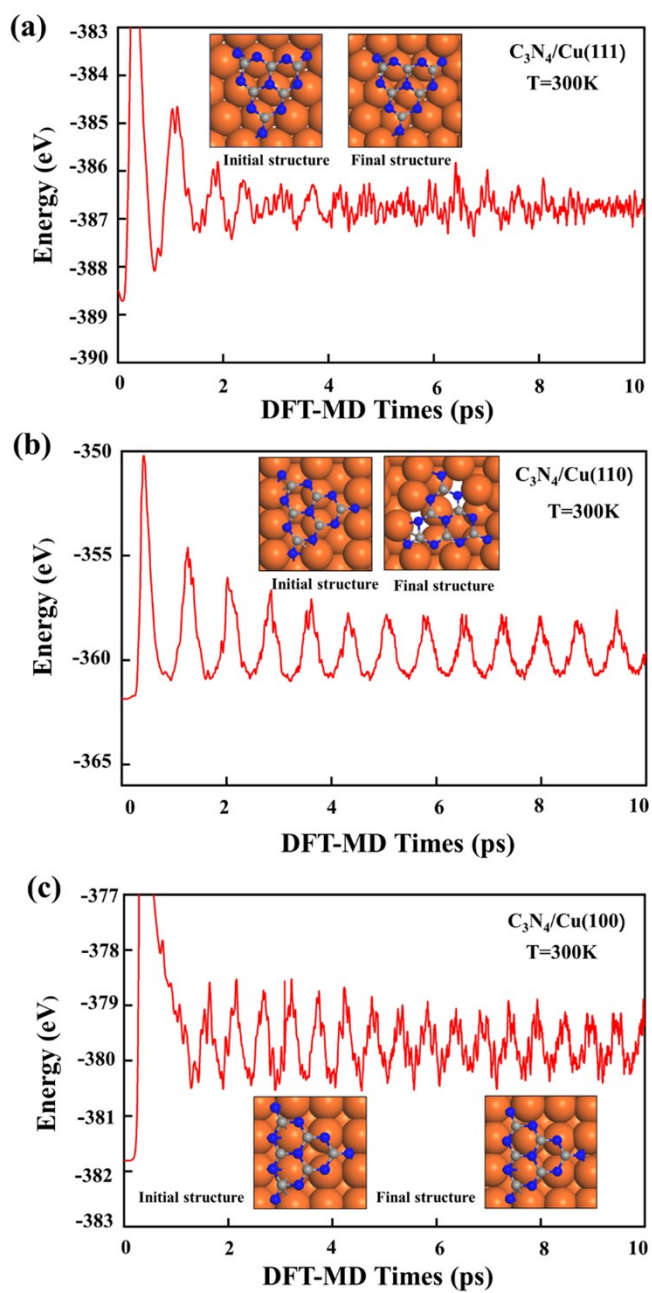

**Figure S4.** The total energy as a function of MD time. (a)  $C_3N_4/Cu(111)$ , (b)  $C_3N_4/Cu(110)$ , (c)  $C_3N_4/Cu(100)$ . The inset shows the initial and final structures.

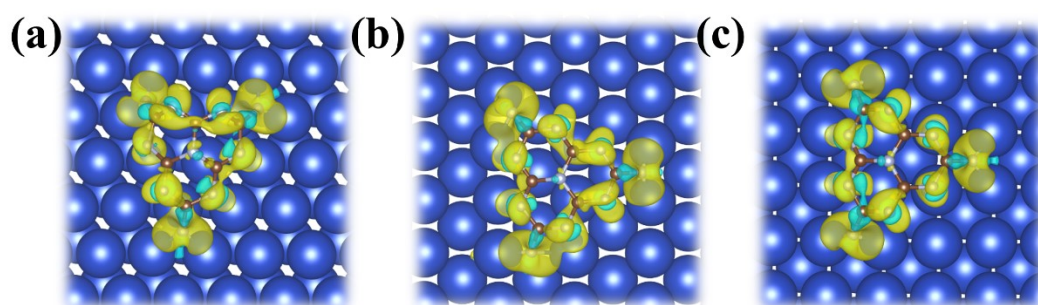

**Figure S5.** The charge difference densities (CDD) of (a)  $C_3N_4/Cu(111)$ , (b)  $C_3N_4/Cu(110)$  and (c)  $C_3N_4/Cu(100)$ .



$C_3N_4/Cu(100)$ . The isosurface value is  $0.001e/\text{\AA}^3$ . Yellow and cyan represent charge accumulation and depletion, respectively. The grey, white, and blue balls represent carbon, nitrogen, copper atoms, respectively.

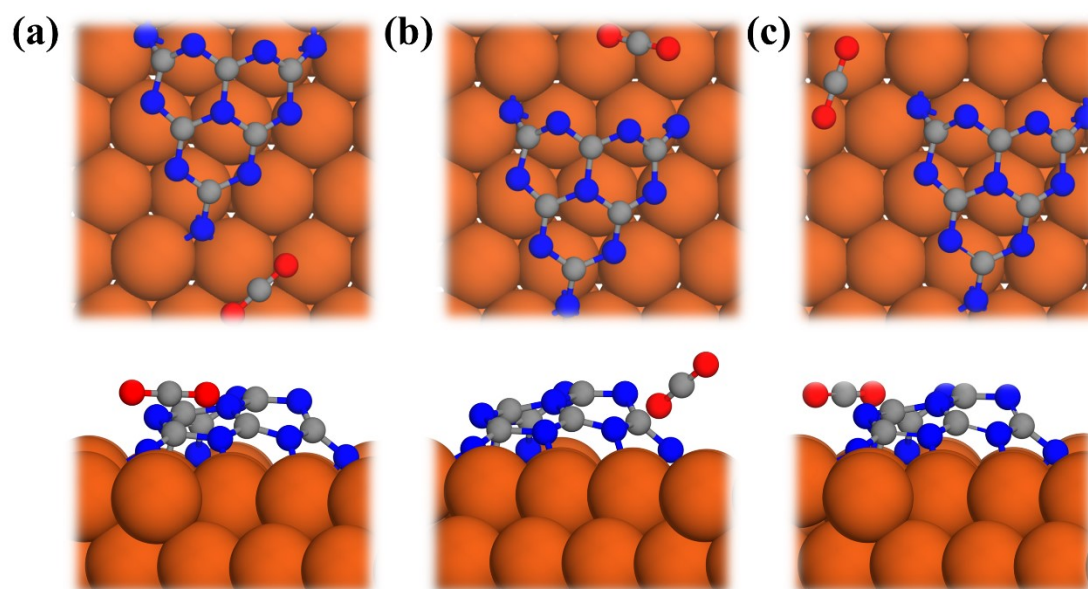

**Figure S6.** The top and side views of optimized structures of CO<sub>2</sub> adsorptions on (a) N1, (b) N2 and (c) N3 sites with O-N position on  $C_3N_4/Cu(111)$ .

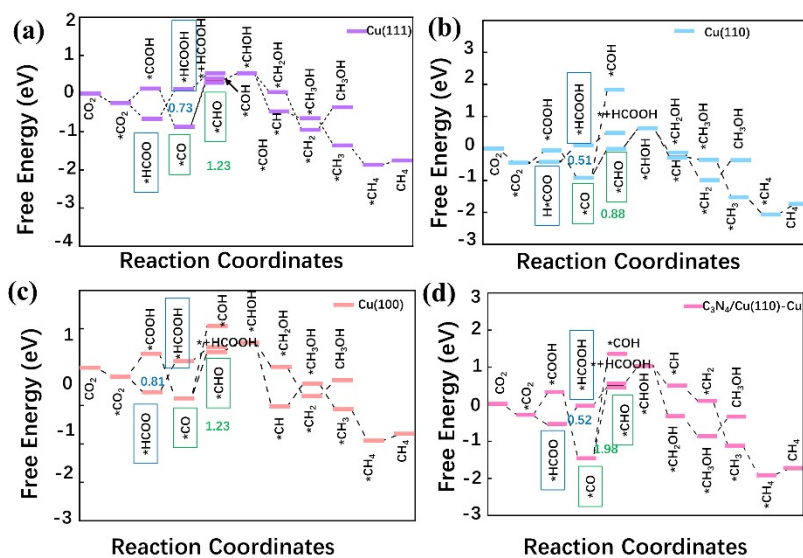

**Figure S7.** The calculated free energy pathways for CO<sub>2</sub>RR on the (a) Cu(111), (b) Cu(110), (c) Cu(100) and (d) Cu sites near  $C_3N_4/Cu(110)$  interface. The  $\Delta G_{\max}$  and PDS for CH<sub>4</sub> and CH<sub>3</sub>OH are same, which is highlighted in green. The  $\Delta G_{\max}$  and PDS for HCOOH is highlighted in blue.

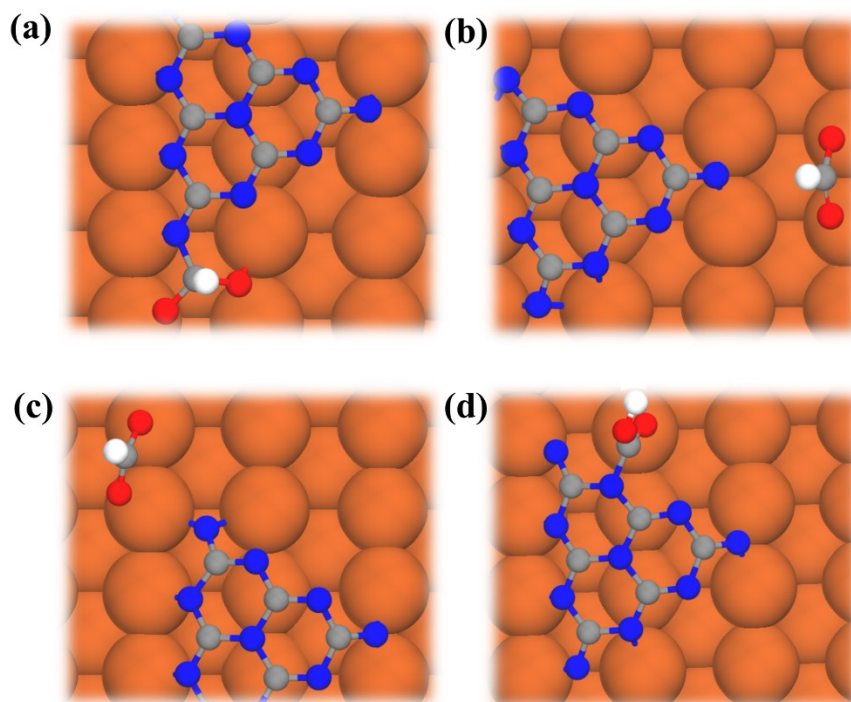

**Figure S8.** The \*HCOO on (a) C<sub>3</sub>N<sub>4</sub>/Cu(110)-N1, not stably formed on (b) C<sub>3</sub>N<sub>4</sub>/Cu(110)-N2, (c) C<sub>3</sub>N<sub>4</sub>/Cu(110)-N3 and (d) C<sub>3</sub>N<sub>4</sub>/Cu(110)-E4.

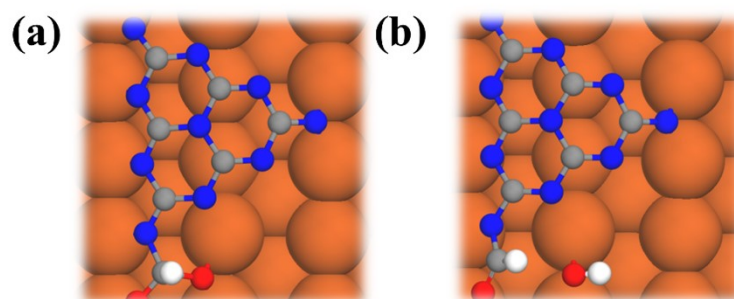

**Figure S9.** (a) \*HCOO and (b) \*CHO+\*OH on C<sub>3</sub>N<sub>4</sub>/Cu(110)-N1.



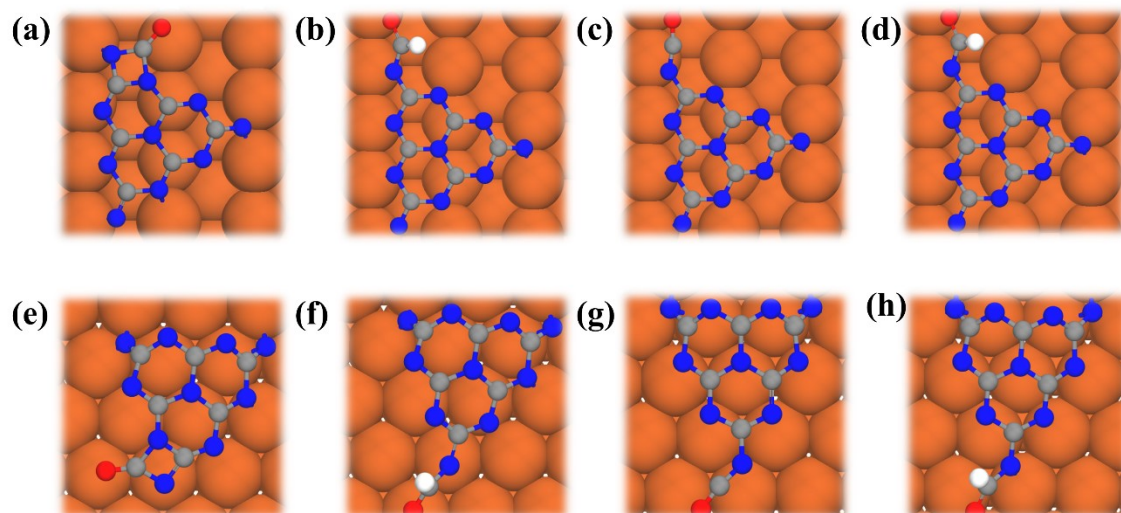

**Figure S10.** (a-d) The \*CO and \*CHO formed on  $C_3N_4/Cu(110)$ -E4 and  $C_3N_4/Cu(110)$ -N3, respectively, (e-h) The \*CO and \*CHO formed on  $C_3N_4/Cu(111)$ -E6 and  $C_3N_4/Cu(111)$ -N1, respectively.

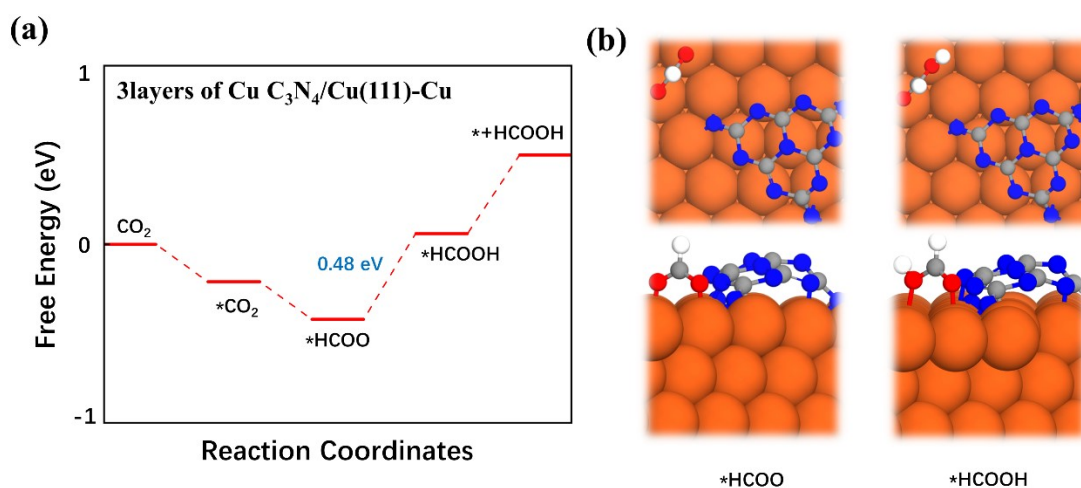

**Figure S11** (a) The free energy pathways of 3 layers of Cu for  $C_3N_4/Cu(111)$ . The  $\Delta G_{max}$  is highlighted in blue. (b) The top and side views of \*HCOO and \*HCOOH on  $C_3N_4/Cu(111)$

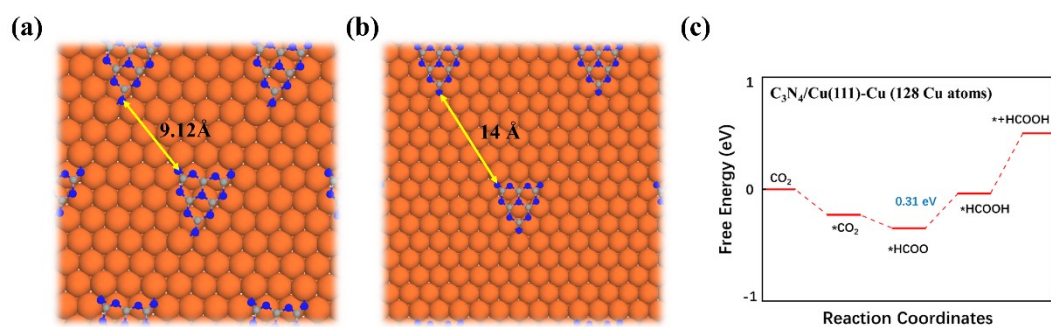

**Figure S12** The  $C_3N_4/Cu(111)$  structures with different  $C_3N_4$  concentrations. (a) original concentration, (b) lower concentrations (c) The free energy pathways of HCOOH production on the  $C_3N_4/Cu(111)$ -Cu with lower  $C_3N_4$  concentration. The  $\Delta G_{max}$  is highlighted in blue.

**Table S1** The adsorption energies of CO<sub>2</sub> adsorbed on the different Cu sites near the C<sub>3</sub>N<sub>4</sub>/Cu interfaces.

| Sites                                             | E <sub>tot</sub> (eV) | E <sub>substrate</sub> (eV) | E <sub>CO<sub>2</sub></sub> (eV) | E <sub>ad</sub> (eV) |
|---------------------------------------------------|-----------------------|-----------------------------|----------------------------------|----------------------|
| C <sub>3</sub> N <sub>4</sub> /Cu(111)-Cu-top--   | -416.3                | -393.09                     | -22.98                           | <b>-0.23</b>         |
| C <sub>3</sub> N <sub>4</sub> /Cu(111)-Cu-hcp     | -416.31               | -393.09                     | -22.98                           | -0.24                |
| C <sub>3</sub> N <sub>4</sub> /Cu(111)-Cu-fcc     | -416.28               | -393.09                     | -22.98                           | -0.21                |
| C <sub>3</sub> N <sub>4</sub> /Cu(111)-Cu-bridge  | -416.3                | -393.09                     | -22.98                           | -0.23                |
| C <sub>3</sub> N <sub>4</sub> /Cu(110)-Cu-hollow  | -383.64               | -360.36                     | -22.98                           | <b>-0.3</b>          |
| C <sub>3</sub> N <sub>4</sub> /Cu(110)-Cu-bridge- | -383.56               | -360.36                     | -22.98                           | -0.22                |
| C <sub>3</sub> N <sub>4</sub> /Cu(110)-Cu-top     | -383.56               | -360.36                     | -22.98                           | -0.22                |
| C <sub>3</sub> N <sub>4</sub> /Cu(100)-Cu-hollow  | -404.94               | -381.7                      | -22.98                           | <b>-0.26</b>         |
| C <sub>3</sub> N <sub>4</sub> /Cu(100)-Cu-top     | -404.9                | -381.7                      | -22.98                           | -0.22                |
| C <sub>3</sub> N <sub>4</sub> /Cu(100)-Cu-bridge  | -404.94               | -381.7                      | -22.98                           | -0.26                |

**Table S2** The adsorption energies of CO<sub>2</sub> adsorbed on nitrogen sites of C<sub>3</sub>N<sub>4</sub>/Cu(111) interfaces with C-N and O-N configurations.

| Sites                                          | E <sub>tot</sub> (eV) | E <sub>substrate</sub> (eV) | E <sub>CO<sub>2</sub></sub> (eV) | E <sub>ads</sub> (eV) |
|------------------------------------------------|-----------------------|-----------------------------|----------------------------------|-----------------------|
| C <sub>3</sub> N <sub>4</sub> /Cu(111)-N1-C-N- | -416.84               | -393.09                     | -22.98                           | -0.77                 |
| C <sub>3</sub> N <sub>4</sub> /Cu(111)-N2-C-N  | -417.03               | -393.09                     | -22.98                           | -0.96                 |
| C <sub>3</sub> N <sub>4</sub> /Cu(111)-N3-C-N  | -416.55               | -393.09                     | -22.98                           | -0.48                 |
| C <sub>3</sub> N <sub>4</sub> /Cu(111)-N1-O-N  | -416.31               | -393.09                     | -22.98                           | -0.24                 |
| C <sub>3</sub> N <sub>4</sub> /Cu(111)-N2-O-N  | -416.29               | -393.09                     | -22.98                           | -0.22                 |
| C <sub>3</sub> N <sub>4</sub> /Cu(111)-N3-O-N  | -416.3                | -393.09                     | -22.98                           | -0.23                 |

**Table S3** The binding energies between  $C_3N_4$  and 2-layers Cu(111) and 3-layers Cu(111).

| Structures                    | $E_{total}(eV)$ | $E_{Cu}(eV)$ | $E_{C_3N_4}(eV)$ | $E_{binding}(eV)$ |
|-------------------------------|-----------------|--------------|------------------|-------------------|
| $C_3N_4/Cu(111)$ (2layers Cu) | -393.06         | -256.93      | -122.94          | -13.19            |
| $C_3N_4/Cu(111)$ (3layers Cu) | -545.81         | -409.18      | -122.94          | -13.69            |
